1 **Title:** Alternative splicing tunes sodium channels to support channel- and neuron-specific effects

2 Gabriele Lignani<sup>1</sup>, Andrianos Liavas<sup>1</sup>, Dimitri M Kullmann<sup>1</sup> & Stephanie Schorge<sup>2</sup>

3 <sup>1</sup>Department of Clinical and Experimental Epilepsy, UCL Queen Square Institute of Neurology, London  
4 WC1N 3BG, UK.

5 <sup>2</sup>Department of Pharmacology, UCL School of Pharmacy, London WC1N 1AX, UK.

6 \*Corresponding Author: [s.schorge@ucl.ac.uk](mailto:s.schorge@ucl.ac.uk)

7

8 Abbreviated title: Neuron-specific effects of sodium channel splicing

9

10 Conflicts of interest: None

11 **Abstract (250) 224**

12 Neuronal excitability is tightly regulated, requiring rapidly activating and inactivating voltage-gated  
13 sodium channels to allow accurate temporal encoding of information. Alternative splicing greatly  
14 broadens the repertoire of channels, but the adaptive significance of this phenomenon is  
15 incompletely understood. An alternative splicing event that is conserved across vertebrates affects  
16 part of the first domain of sodium channels and modulates their availability after inactivation. Here  
17 we use this conserved splicing event to ask whether this modulation has consistent effects in  
18 different neuronal backgrounds, or whether a conserved splicing event can be exploited to produce  
19 distinct effects in different cell types. We show that the consequences of alternate splicing of human  
20 Nav1.1 and Nav1.2 for neuronal activity depend on whether they are expressed in the cell types  
21 where they normally predominate (interneurons or excitatory neurons, respectively). Splicing in the  
22 'adult' isoform in both channels is sufficient to slow action potential rise times in all neurons.  
23 However, changes to both action potential half width and maximal firing rate are specific to cell type  
24 and channel, with each channel appearing tuned to mediate effects in its predominant neuronal  
25 background. Finally, we use dynamic clamp to demonstrate that alternative splicing in Nav1.1  
26 changes how interneurons fire during epileptiform events. Our data show that, for sodium channels,  
27 despite conserved amino acid changes and similar effects on channel gating, alternative splicing has  
28 distinct impacts on neuronal properties, thus highlighting how closely sodium channels are tuned to  
29 distinct cellular backgrounds.

30

31

## 32 Introduction

33 Mutations in sodium channel genes are increasingly associated with different neurological disorders,  
34 and there is growing consensus that mutations which lead to gain of function (GOF) or loss of  
35 function (LOF) can lead to clinically distinct disorders, and this dependent both on the type of gene  
36 and the channel targeted. For example *SCN2A*, which is thought to dominate early in development  
37 at axon initial segments (AIS) in excitatory neurons, and plays an important role in dendritic  
38 excitability later in life (Spratt et al., 2019), is associated with severe seizure disorders when  
39 mutations increase function, but LOF mutations in the same gene are one of the strongest risk  
40 factors for autism (Ben-Shalom et al., 2017)(<https://gene.sfari.org/>). In contrast a growing genotype-  
41 phenotype spectrum suggests that LOF mutations in *SCN1A* are closely linked to the severe epilepsy  
42 Dravet Syndrome, while GOF in this channel is more associated with migraine (Brunklaus et al.,  
43 2020a). The link between LOF and increased seizures, is thought to be because loss of this channel  
44 may predominantly affect inhibitory interneurons (Yu et al., 2006).

45 The increasing availability of genetic data linked to high quality clinical findings, means that a  
46 growing number of mutations producing similar functional consequences in different sodium  
47 channels have been reported. These mutations can lead to different disease manifestations, but  
48 these manifestations are consistent with the mutations having similar impacts on the channels  
49 themselves, i.e. a LOF mutation linked to Dravet syndrome in *SCN1A* is likely to also lead to a LOF  
50 impact in *SCN2A*, but LOF in *SCN2A* would be expected to be associated with risk of autism rather  
51 than epilepsy, as seizures are more associated with GOF in *SCN2A* (Brunklaus et al., 2020b).

52 Highly conserved splicing in the first domain of sodium channels imposes functionally conserved  
53 effects on channel behavior in neuronal sodium channels (Liavas et al., 2017). The alternate splice  
54 variants are conventionally designated 'Adult' or 'A', and 'Neonatal' or 'N', affecting the 5<sup>th</sup> exon of  
55 *SCN1A* (Nav1.1 6A or Nav1.1 6N) or the homologous 6<sup>th</sup> exon of *SCN2A* (Nav1.2 6A or Nav1.2 6B). By  
56 comparing the consequences of expressing two splice variants, it is possible to ask whether a

57 homologous change, with conserved functional consequences in different channels, has evolved to  
58 produce conserved changes in neuronal activity, or whether the diversity of channels and neurons  
59 allows even a conserved change to be exploited for different consequences in difference cell types.

60 We show that the underlying change in channel availability caused by splicing is sufficient to change  
61 action potential rise time in trains of rapid stimuli, and this is seen using either channel and in both  
62 excitatory and inhibitory neurons. However, additional effects of splicing are determined both by the  
63 channel type used, and on the neuronal background in which the channel is expressed. These data  
64 not only reveal a consistent impact of splicing on action potential kinetics, but also demonstrate how  
65 exquisitely tuned sodium channels are to different neuronal properties.

66

67 **Materials and methods**

68 *DNA constructs and Cloning*

69 Human Nav1.1 cDNAs in the pcDM8 vector were transformed into TOP10/P3 cells, and Nav1.2  
70 cDNAs were in pcDNA3 vectors and transformed into Stbl3 cells, as described previously (Liavas et  
71 al., 2017). Site-directed mutagenesis was performed in Nav1.1 to introduce a single amino acid  
72 change (F383S) in order to confer TTX resistance according to previous studies (Bechi et al., 2012;  
73 Cestèle et al., 2013) using the QuikChange II XL kit according to the manufacturer's instructions  
74 (Stratagene, CA). The homologous mutation was also performed in Nav1.2 (F385S)(Rush et al.,  
75 2005). Successful mutagenesis was confirmed by DNA sequencing.

76 *Hippocampal neuron culture and transfection*

77 Hippocampal neurons were isolated from P0 GAD67-GFP knock-in mouse pups (Tamamaki et al.,  
78 2003), where interneurons can be visually distinguished by GFP expression as previously described  
79 (Kaeck and Banker, 2006). The pcDM8-hNav1.1 5A/5N or pcDNA3-hNav1.2 6A/6N DNA vector was co-  
80 transfected with a reporter Red Fluorescent Protein (RFP)-carrying plasmid under a beta-actin  
81 promoter in a 5 : 1 molar ratio. The neurons were transfected on day 4 after plating by magnetofection  
82 with NeuroMag according to the manufacturer's instructions (OZ biosciences). Recordings were  
83 performed 3-6 days after transfection. For recordings from interneurons, cells patched showed co-  
84 localization of both green (indicating interneurons) and red (indicating successful transfection with  
85 the sodium channel plasmid) fluorescence.

86 *Whole cell patch clamp recordings in neurons*

87 For current-clamp recordings of transfected neurons, the internal solution contained (in mM): 126 K-  
88 gluconate, 4 NaCl, 1 MgSO<sub>4</sub>, 0.02 CaCl<sub>2</sub>, 0.1 BAPTA, 15 Glucose, 5 HEPES, 3 ATP-Na<sub>2</sub>, 0.1 GTP-Na, pH  
89 7.3. The extracellular (bath) solution contained (in mM): 2 CaCl<sub>2</sub>, 140 NaCl, 1 MgCl<sub>2</sub>, 10 HEPES, 4 KCl,

90 10 glucose, pH 7.3. D-(–)-2-amino-5-phosphonopentanoic acid (D-AP5; 50  $\mu$ M), 6-cyano-7-  
91 nitroquinoxaline-2,3-dione (CNQX; 10  $\mu$ M) and picrotoxin (PTX; 30  $\mu$ M) were added to block synaptic  
92 transmission. Tetrodotoxin (TTX; 1  $\mu$ M) was added to block endogenous sodium channels, allowing  
93 isolation of transfected TTX-resistant sodium currents. Experiments were performed at room  
94 temperature (22-24°C). Neurons with unstable resting potential and/or bridge-balance >15 M $\Omega$  were  
95 discarded. Bridge balance compensation was applied and the resting membrane potential was held at  
96 -70 mV. Action potentials were evoked by injecting 10 ms long depolarizing current steps of increasing  
97 amplitude. For the firing frequency reliability protocol, a 110% value of the threshold current was  
98 delivered in 11 consecutive pulses with increasing frequency in each series (33 – 90 Hz). All recordings  
99 and analysis for neurons were carried by a researcher blinded to the isoform expressed. Recordings  
100 were acquired using a Multiclamp 700B amplifier (Axon Instruments, Molecular Devices, Sunnyvale,  
101 CA, USA) using in house software written in LabVIEW 8.0 (DMK), filtered at 10 kHz and digitized at 50  
102 kHz.

### 103 *Analysis of single action potential parameters*

104 The single action potential shape parameters were derived using pClamp (Molecular Devices) and  
105 analyzed with Prism (GraphPad Software, Inc.). A phase-plane plot of the first action potential elicited  
106 after sufficient depolarization with current steps was obtained for each cell by plotting the time  
107 derivative of voltage (dV/dt) versus the voltage. This allowed identification of the AP voltage  
108 threshold, peak and amplitude as well as the maximum rising and depolarizing slopes (Bean, 2007).  
109 The action potential threshold was defined as the voltage at which dV/dt exceeded 10 mV/ms, similar  
110 to other studies (Pozzi et al., 2013).

### 111 *Dynamic clamp recordings in neurons*

112 Recordings were carried out as described previously (Morris et al., 2017). Briefly, current traces in  
113 voltage-clamp configuration in the presence of 4AP were recorded holding neurons at -70mV, the

114 resulting current traces were converted in conductance ( $G=I/V$ ). Using Signal dynamic clamp software  
115 in conjunction with CED Power 1401-3 (CED, Cambridge Electronic Design Limited) the conductance  
116 traces were used to inject currents in neurons (in  $1\mu\text{M}$  TTX), in the current clamp configuration. During  
117 recordings, the voltage of the patched neurons was read in real time, and used to calculate the current  
118 to be injected from the 4AP conductance trace. In order to compare different cells, the conductance  
119 threshold was calculated in each neuron prior to each dynamic clamp experiment using AMPA  
120 conductance steps ( $E_{\text{rev}}=0\text{mV}$ ;  $\tau=1\text{ms}$ ;  $\Delta G=1\text{nS}$ ), and the injected epileptiform conductance traces  
121 were scaled to this threshold. To scale each neuron a 15% of the conductance threshold was injected  
122 inn both inhibitory and excitatory neurons. This value has been used because neurons reached the  
123 plateau and their maximal firing rate at this percentage (Figure 1).

124

#### 125 *Statistical analysis*

126 Results are shown as mean  $\pm$  s.e.m. Data were tested for normality using the Shapiro-Wilk test.  
127 Normally distributed two sample groups were compared by Student's unpaired two-tailed t-test, at a  
128 significance level of  $P < 0.05$ . Sample groups without a normal distribution were compared using  
129 Fisher's exact test (two-tailed). For comparisons of more than two sample groups, ANOVA was used,  
130 followed by either the Bonferroni method or Dunnett's test. Statistical analysis was carried out using  
131 Prism, Origin (OriginLab) or SPSS (IBM).

132

133 **Results**

134 **Functional comparison of sodium channel variants in neurons**

135 In HEK cells, alternate splicing of the same region of Nav1.1, Nav1.2 or Nav1.7 (encoded by *SCN1A*,  
136 *SCN2A* and *SCN9A* respectively) has a conserved effect on channel availability during trains of  
137 depolarizing steps (Liavas et al., 2017). Extrapolating these findings to neurons presents two  
138 challenges. First, multiple voltage-gated sodium channels are expressed, and second, the  
139 inhomogeneous distribution of channels in different compartments, including the axon and  
140 dendrites, precludes good voltage control.

141 To overcome these challenges, we characterized the effects of the splice variants in channels  
142 engineered to have reduced sensitivity to TTX block (see methods), and recorded from neurons  
143 transfected with individual variants in the presence of 1  $\mu$ M TTX, thereby allowing the contributions  
144 of the transfected variants to be isolated from endogenous sodium channels. Furthermore, we used  
145 proxy measures of sodium channel activity and availability in the current clamp configuration. While  
146 current clamp cannot give a direct measure of the current density produced by the different channel  
147 variants, the density of sodium channels is correlated to the rising slope of action potentials, which is  
148 increased when more channels are available, and slowed when fewer sodium channels are available  
149 due to accumulation in inactivated states during trains of rapid firing (Carter and Bean, 2011).  
150 Changes to the falling phase of action potentials are largely set by the presence of different  
151 potassium channels in different neurons, and consequently of less utility in assessing sodium  
152 channel behavior (Bean, 2007).

153 **Effects of splicing in Nav1.2 in excitatory neurons**

154 Nav1.2 is thought to be predominately expressed in excitatory neurons, particularly in early  
155 development, and its location and function change in adulthood (Oliva et al., 2012; Spratt et al.,



156 2019). To isolate excitatory neurons, we transfected N or A splice variants of Nav1.2 into primary  
157 hippocampal cultures prepared from GAD67-GFP knock-in mice (Tamamaki et al., 2003) which allows  
158 excitatory neurons to be discriminated from inhibitory neurons. In the presence of TTX, excitatory  
159 neurons expressing TTX-resistant splice variants of Nav1.2 had similar AP thresholds, rising slopes,  
160 and amplitudes, as well as passive membrane properties (RMP, input resistance), suggesting a  
161 similar density of channel expression for both variants (Table 1). We applied depolarizing pulses at  
162 different frequencies and examined both the ability to generate APs (Figure 2A-C) and the AP shape  
163 (Figure 2D).

164 A previous study showed that animals engineered to express only the A variant of SCN2A throughout  
165 development exhibited multiple changes in immature neurons, including an increase in firing rate  
166 and a shortened AP half width, but these differences were obscured as neurons matured (Gazina et  
167 al., 2015). Similar to the *in vivo* effects, we found in our system that the A variant of Nav1.2 also  
168 produced APs with shorter half widths (Figure 2D).

169 In HEK cells the most consistent functional consequence of alternative splicing was reduced  
170 availability of the A variants to activate during trains of stimuli (Liavas et al., 2017). In three different  
171 channels, incorporation of the A exon led to reduced channel availability after short depolarizing  
172 pulses. In neurons in the current clamp configuration, reduced channel availability would be  
173 consistent with splicing changing the ability of neurons to fire APs in response to rapid stimuli. For  
174 example, by reducing channel availability after short depolarizations, inclusion of the A exon might  
175 reduce the maximal firing rate, or progressively slow the rising phase of APs which can be limited by  
176 number of available channels. To test whether splicing was sufficient to change the availability of  
177 sodium channels during trains of rapid stimulations, we compared excitatory neurons expressing  
178 both splice variants of SCN2A, and asked whether AP parameters were affected during trains of  
179 stimulations.

180 Although there was a trend for the N variant of Nav1.2 to support firing at higher rates than the A  
181 variant, the difference did not reach significance (Figure 2A-C). This suggests that the alteration in  
182 availability is not sufficient in these neurons to disrupt initiation of regenerative APs. Both neonatal  
183 and adult variants of Nav1.2 showed pronounced slowing of AP rise-times during trains, consistent  
184 with reduced channel availability (at a frequency of 44 Hz; Figure 2E, F). The only robust difference  
185 between splice variants when examining AP rise times was observed with short inter-stimulus  
186 intervals (Figure 2G). The slower rise time for the A variant at 67 Hz is qualitatively consistent with  
187 data from HEK expression which also demonstrated more pronounced effects of splicing after shorter  
188 intervals (Liavas et al., 2017).

### 189 **Splicing in Nav1.1 changes channel availability and spike reliability in interneurons**

190 Although splicing in all three channels studied in HEK cells imposed conserved changes on channel  
191 availability, the background rates of recovery were specific for each channel, suggesting these  
192 channels may be tuned to the neuronal types in which they are thought to predominate. Specifically,  
193 Nav1.1 and Nav1.2 channels underlie excitability of interneurons and principal neurons respectively  
194 (Ogiwara et al., 2007; Yu et al., 2006). We therefore asked how splice variants of Nav1.1 affect the  
195 firing of interneurons. As with Nav1.2, in the presence of TTX, neurons expressing TTX-resistant splice  
196 variants of Nav1.1 had similar passive membrane properties (Table 2).

197 We applied a similar series of depolarizing pulses at different frequencies in the presence of TTX (Fig.  
198 2A-C). In striking contrast to Nav1.2 in excitatory neurons, splicing in Nav1.1 had a major effect on  
199 action potential reliability in interneurons, especially pronounced at intermediate frequencies  
200 (Figure 3B, C). It however had no significant effect on the half-width of APs in inhibitory neurons  
201 (Figure 3D).

202 Finally, inclusion of the A exon of Nav1.1 led to a substantial slowing in the rising phase of action  
203 potentials in inhibitory neurons exposed to repetitive stimuli (Figure 3E, F), which was greater than

204 the effect of splicing of Nav1.2 in excitatory neurons (Figure 2E, F). While interneurons expressing  
205 the A variant of Nav1.1 had a pronounced slowing of the rising slope as trains of stimuli progressed  
206 (similar to either variant of Nav1.2 in excitatory neurons), interneurons expressing the N variant  
207 maintained fast rising slopes throughout the train of pulses. This preservation of the fast rising slope  
208 is consistent with sustained sodium channel availability when the N variant is expressed.

209 These data indicate that, although splicing of sodium channels has conserved effects in HEK cells  
210 (altering availability after inactivation), it results in very different consequences on APs in distinct  
211 neuronal populations in which the channels dominate.

## 212 **Neuronal background filters the effects of sodium channel splicing**

213 To determine whether the effects of splicing were dependent on channel biophysics or on the cellular  
214 background, we asked whether the effects of splicing of Nav1.1 in interneurons carry over to  
215 excitatory neurons. Specifically, do splice variants of Nav1.1 expressed in excitatory neurons behave  
216 like Nav1.1 in interneurons, or more like Nav1.2 variants in excitatory neurons? As previously, neurons  
217 expressing TTX-resistant splice variants of Nav1.1 had similar passive membrane properties (Table 3).

218 When driven with repetitive depolarizing pulses, excitatory neurons expressing N and A variants of  
219 Nav1.1 showed similar failure rates (Figure 4A-C). Expression in excitatory neurons thus prevented  
220 variants of Nav1.1 from imposing the sustained rise times in trains of stimuli, instead variants of  
221 Nav1.1 behaved more like variants of Nav1.2. In these experiments, neuronal background thus  
222 predominates in determining whether splice variants of sodium channels are sufficient to change  
223 maximal firing rates. However, neuronal background was not sufficient to completely override the  
224 channel type, because in excitatory neurons splicing in Nav1.1 was also not sufficient to change the  
225 half width of APs (Figure 4D). This suggests that the effect of splicing on half width is specific to Nav1.2,  
226 and not due to cellular background. We conclude that splice variants have conserved effects at

227 molecular level, but that the cellular backgrounds predominate in determining how these effects  
228 translate to changes in neuronal activity.

### 229 **Delivery of epileptiform burst inputs highlights cell-type specific impact of splicing**

230 Splicing in Nav1.1 has particular clinical relevance, as a polymorphism in this channel has been  
231 associated with response to AEDs and with the development of some forms of epilepsy  
232 (Kasperaviciute et al., 2013; Tate et al., 2005). This raises the possibility that splicing in Nav1.1 can  
233 modify how neurons respond during seizures, and the finding that the N variant sustains more action  
234 potentials without failures in trains of fast stimuli suggests these channels may also support greater  
235 activity during seizure activity. To test this possibility, we applied “activity clamp” (Morris et al.,  
236 2017), which is a dynamic clamp protocol that allows direct comparison of how different neurons  
237 respond to identical barrages of synaptic conductances recorded during an epileptiform event. It is  
238 especially informative of how individual neurons fire during seizures without contamination by the  
239 network consequences of neurotransmitter release from their terminals. Since Nav1.1 channels are  
240 thought to be particularly important in inhibitory neurons, we first asked whether splicing in Nav1.1  
241 altered how interneurons responded during simulated seizure like inputs.

242 To reproduce the synaptic barrage, we recorded synaptic currents experienced by a representative  
243 neuron held in voltage clamp during epileptiform events (evoked by exposure to 4-Aminopyridine),  
244 and calculated the corresponding conductance waveforms (Figure 5, see methods). These were then  
245 delivered to neurons recorded in dynamic clamp with neurotransmitter receptors blocked and TTX  
246 applied (Morris et al., 2017). This method allowed us to probe how neurons transfected with  
247 different TTX-resistant sodium channel splice variants respond to synaptic inputs experienced during  
248 a seizure (Figure 5 - H).

249 Consistent with our current clamp data, interneurons expressing the A variant of Nav1.1 showed a  
250 lower maximal firing rate than interneurons expressing the N variant. Taking a cut-off for the  
251 instantaneous firing frequency of 50 Hz, 15/17 interneurons expressing the N variant exceeded this

252 value, but only 7/14 interneurons expressing the A variant were able to fire at this frequency (Figure  
253 5D;  $p = 0.019$ , Fisher's exact test, two-tails). The number of APs, maximal frequency and rising slopes  
254 induced by activity clamp, were all significantly greater in interneurons expressing the N variant  
255 (Figure 5 E-G).

256 Our current clamp data suggest this effect may not be replicated, even using the same Nav1.1 splice  
257 variants, in excitatory neurons. To test this hypothesis, we expressed Nav1.1 variants in excitatory  
258 neurons, and delivered synaptic inputs recorded from an excitatory neuron during an epileptiform  
259 event (evoked by exposure to 4-Aminopyridine). As predicted, in excitatory neurons, neither the  
260 maximal spiking rate or the AP rising slope was not affected by expression of different splice variants  
261 of Nav1.1 (Figure 6 A-G). However, we detected a non-significant increase in rising slope ( $p=0.07$ ),  
262 qualitatively similar to that observed with current clamp experiments in the same neuronal  
263 population (Figure 4 G and Figure 6 G). This difference between interneurons and excitatory neurons  
264 is consistent with the principle that the biophysics of sodium channel variants are particularly  
265 optimised for modulating activity in specific neuronal backgrounds, and Nav1.1 splicing is specifically  
266 tuned to modulate interneurons, but is ineffective in changing the maximal firing rate in excitatory  
267 neurons.

268 The present data reveal that splicing in sodium channels is exquisitely tuned to the cell types in  
269 which these channels are found. Even the highly conserved consequences of splicing can have  
270 differing effects depending on the neuronal background. This specificity of splicing is seen in spite of  
271 the highly conserved site, and similar functional consequences when studied in non-neuronal cells.

272

273 **Discussion**

274 The present study shows that the functional consequences of a conserved alternative splicing  
275 phenomenon are due both to the functional impact of the splicing per se on the sodium channel and  
276 to the cell type in which the channel subtype is expressed. The functional impact of splicing appears  
277 finely tuned to the type of neuron in which that channel dominates. These data show that sodium  
278 channels are so sensitive to neuronal environment, that even changes that produce similar  
279 biophysical effects can have different consequences for neuronal activity.

280 **The conserved effect of splicing on AP rise time and spike timing**

281 Signal processing in the axon initial segment is highly dependent on the density of sodium currents  
282 (Kole and Stuart, 2012), consequently even by contributing relatively small changes to the availability  
283 of channels to pass currents, splicing could impact neuronal output. The main overall conserved  
284 effect of splicing is on the rise time of action potentials in trains. This could imply that splicing is  
285 important for modulating spike timing (Scott et al., 2014). It has also recently been shown that  
286 changing sodium channel availability, predominantly by sequestering channels into unstable  
287 inactivated states, allows channels to act as leaky integrators to control firing probability in neurons  
288 in response to previous activity (Navarro et al., 2020). The inactive states we have focused on are the  
289 fast inactive states, but our findings are consistent with the change in proportion of channels  
290 entering fast inactive states having effects on high frequency firing rates. In our conditions only  
291 variants of Nav1.1 in inhibitory neurons were sufficient to modify firing frequency, suggesting that  
292 the limits of frequency in excitatory neurons are set by different parameters, or other populations of  
293 channels, such as relatively few Kv3 channels in these cells (Gu et al., 2018).

294 **Splicing, channel availability in Nav1.1 and fast firing cells**

295 In inhibitory neurons with small diameter axons, the density of sodium currents is even more critical,  
296 and is strongly correlated to speed of action potential propagation (Hu and Jonas, 2014). The  
297 proportionately greater effects of splicing in Nav1.1 on interneuronal firing are consistent with a  
298 subtle effect of this splicing on development of febrile seizures, and potentially dosage of AEDs (Tate  
299 et al., 2005). Unlike splicing in other sodium channel genes, splicing in *SCN1A/Nav1.1* appears to be  
300 under evolutionary pressure to remove the N exon, and reduce the channels that allow the highest  
301 frequencies of firing (Liavas et al., 2017). The interaction between splicing and interneurons which  
302 fire rapid action potentials may be confounded by the presence of sodium channels that do not  
303 completely inactivate, but remain available, after these fast action potentials (Carter and Bean,  
304 2011).

305 Although we have considered Nav1.1 as predominantly interneuronal, and Nav1.2 as predominantly  
306 expressed in (young) excitatory neurons, it should be noted this segregation is not complete. Indeed,  
307 recently Nav1.2 was found to play an important role in the AIS of a subset of interneurons (Li et al.,  
308 2014) highlighting how sodium channels can be specialized not just to different cell types, but to  
309 different regions within cells.

### 310 **Significance of splicing in Nav1.2**

311 The effect on halfwidth of AP appears specialized for Nav1.2, and may reflect this channel's  
312 importance during the development of neurons (Berecki et al., 2018; Gazina et al., 2015; Spratt et  
313 al., 2019). The roles of Nav1.2 are particularly important in back-propagating APs that invade the  
314 somatodendritic region (Spratt et al., 2019). Modulation of these currents by G-protein coupled  
315 receptors is sufficient to alter spike timing (Yu et al., 2018). Recently, reducing channel availability  
316 with either relatively low concentrations of TTX (20 nM ) or phenytoin (100  $\mu$ M) was shown to be  
317 critical for determining the non-linear amplification of excitatory inputs to dendrites (Hsu et al.,

318 2018), suggesting that modulation of sodium channel availability, such as seen in splicing, may have  
319 robust consequences on signal integration in dendrites.

320 Splicing in Nav1.2 is closely linked to neuronal dysfunction in early development (Berecki et al., 2018;  
321 Thompson et al., 2020). In vivo, restricting Nav1.2 to only the A variant during development  
322 increases the excitability of layer 2/3 pyramidal neurons (Gazina et al., 2015). We did not observe a  
323 net difference in the firing properties of excitatory neurons in our experimental setting. This may be  
324 a reflection of the greater potential for homeostatic compensations during development in vivo, and  
325 the fact that in our system, in the absence of TTX, cells could express a range of sodium channels.  
326 Our data underline, in the absence of homeostatic changes, how sodium channel function has  
327 specific effects in different neuronal backgrounds, but do not give long term readouts of how cells  
328 might respond to being restricted to individual variants. However, in support of the neuronal  
329 parameters being sufficient to change the impact of splicing, in models based on excitatory neuronal  
330 parameters the A variants of Nav1.2 were sufficient to maintain a higher rate of firing (Thompson et  
331 al., 2020), albeit with a slightly different stimulation protocol than we used here. The observed  
332 differences in biophysical properties, and modelling are consistent with the exquisite sensitivity for  
333 sodium channels for the cellular background. Indeed, though splicing appears to have highly  
334 conserved effects on channels when they are expressed in the same type of cells, the consequences  
335 of these conserved effects are strongly divergent when translated to different neuronal  
336 environments.

337 Overall this work sets a precedent for the specificity of splicing in voltage gated channels and the  
338 precise tuning of these channels to cellular background.

339 **Acknowledgements:** This work was funded by the Wellcome trust (WT104033AIA; 212285/Z/18/Z),  
340 the MRC (R/L01095X/1; MR/L003457/1). SS was funded in part by a Fellowship from the Royal



341 Society (UF140596). GL was supported in part by a Marie Skłodowska-Curie Individual Fellowship,  
342 and by Epilepsy Research UK. AL was funded by an MRC PhD studentship.

343 **References**

- 344 Bean, B.P. (2007). The action potential in mammalian central neurons. *Nat Rev Neurosci* 8, 451–465.
- 345 Bechi, G., Scalmani, P., Schiavon, E., Rusconi, R., Franceschetti, S., and Mantegazza, M. (2012). Pure  
346 haploinsufficiency for Dravet syndrome Na(V)1.1 (SCN1A) sodium channel truncating mutations.  
347 *Epilepsia* 53, 87–100.
- 348 Ben-Shalom, R., Keeshen, C.M., Berrios, K.N., An, J.Y., Sanders, S.J., and Bender, K.J. (2017). Opposing  
349 Effects on Nav1.2 Function Underlie Differences Between SCN2A Variants Observed in Individuals  
350 With Autism Spectrum Disorder or Infantile Seizures. *Biol. Psychiatry* 82, 224–232.
- 351 Berecki, G., Howell, K.B., Deerasooriya, Y.H., Cilio, M.R., Oliva, M.K., Kaplan, D., Scheffer, I.E.,  
352 Berkovic, S.F., and Petrou, S. (2018). Dynamic action potential clamp predicts functional separation  
353 in mild familial and severe de novo forms of SCN2A epilepsy. *Proc. Natl. Acad. Sci. U.S.A.* 115, E5516–  
354 E5525.
- 355 Brunklaus, A., Schorge, S., Smith, A.D., Ghanty, I., Stewart, K., Gardiner, S., Du, J., Pérez-Palma, E.,  
356 Symonds, J.D., Collier, A.C., et al. (2020a). SCN1A variants from bench to bedside-improved clinical  
357 prediction from functional characterization. *Hum. Mutat.* 41, 363–374.
- 358 Brunklaus, A., Du, J., Steckler, F., Ghanty, I.I., Johannesen, K.M., Fenger, C.D., Schorge, S., Baez-Nieto,  
359 D., Wang, H.-R., Allen, A., et al. (2020b). Biological concepts in human sodium channel epilepsies and  
360 their relevance in clinical practice. *Epilepsia* 61, 387–399.
- 361 Carter, B.C., and Bean, B.P. (2011). Incomplete inactivation and rapid recovery of voltage-dependent  
362 sodium channels during high-frequency firing in cerebellar Purkinje neurons. *J. Neurophysiol.* 105,  
363 860–871.
- 364 Cestèle, S., Schiavon, E., Rusconi, R., Franceschetti, S., and Mantegazza, M. (2013). Nonfunctional  
365 Nav1.1 familial hemiplegic migraine mutant transformed into gain of function by partial rescue of  
366 folding defects. *Proc. Natl. Acad. Sci. U.S.A.* 110, 17546–17551.
- 367 Gazina, E.V., Leaw, B.T.W., Richards, K.L., Wimmer, V.C., Kim, T.H., Aumann, T.D., Featherby, T.J.,  
368 Churilov, L., Hammond, V.E., Reid, C.A., et al. (2015). “Neonatal” Nav1.2 reduces neuronal  
369 excitability and affects seizure susceptibility and behaviour. *Hum. Mol. Genet.* 24, 1457–1468.
- 370 Gu, Y., Servello, D., Han, Z., Lalchandani, R.R., Ding, J.B., Huang, K., and Gu, C. (2018). Balanced  
371 Activity between Kv3 and Nav Channels Determines Fast-Spiking in Mammalian Central Neurons.  
372 *IScience* 9, 120–137.
- 373 Hsu, C.-L., Zhao, X., Milstein, A.D., and Spruston, N. (2018). Persistent Sodium Current Mediates the  
374 Steep Voltage Dependence of Spatial Coding in Hippocampal Pyramidal Neurons. *Neuron* 99, 147-  
375 162.e8.
- 376 Hu, H., and Jonas, P. (2014). A supercritical density of Na(+) channels ensures fast signaling in  
377 GABAergic interneuron axons. *Nat. Neurosci.* 17, 686–693.
- 378 Kaech, S., and Banker, G. (2006). Culturing hippocampal neurons. *Nat Protoc* 1, 2406–2415.

- 379 Kasperaviciute, D., Catarino, C.B., Matarin, M., Leu, C., Novy, J., Tostevin, A., Leal, B., Hessel, E.V.S.,  
380 Hallmann, K., Hildebrand, M.S., et al. (2013). Epilepsy, hippocampal sclerosis and febrile seizures  
381 linked by common genetic variation around SCN1A. *Brain* 136, 3140–3150.
- 382 Kole, M.H.P., and Stuart, G.J. (2012). Signal Processing in the Axon Initial Segment. *Neuron* 73, 235–  
383 247.
- 384 Li, T., Tian, C., Scalmani, P., Frassoni, C., Mantegazza, M., Wang, Y., Yang, M., Wu, S., and Shu, Y.  
385 (2014). Action potential initiation in neocortical inhibitory interneurons. *PLoS Biol.* 12, e1001944.
- 386 Liavas, A., Lignani, G., and Schorge, S. (2017). Conservation of alternative splicing in sodium channels  
387 reveals evolutionary focus on release from inactivation and structural insights into gating: Conserved  
388 alternative splicing in sodium channels. *J Physiol* 595, 5671–5685.
- 389 Morris, G., Leite, M., Kullmann, D.M., Pavlov, I., Schorge, S., and Lignani, G. (2017). Activity Clamp  
390 Provides Insights into Paradoxical Effects of the Anti-Seizure Drug Carbamazepine. *J Neurosci* 37,  
391 5484–5495.
- 392 Navarro, M.A., Salari, A., Lin, J.L., Cowan, L.M., Penington, N.J., Milesco, M., and Milesco, L.S. (2020).  
393 Sodium channels implement a molecular leaky integrator that detects action potentials and  
394 regulates neuronal firing. *Elife* 9.
- 395 Ogiwara, I., Miyamoto, H., Morita, N., Atapour, N., Mazaki, E., Inoue, I., Takeuchi, T., Itohara, S.,  
396 Yanagawa, Y., Obata, K., et al. (2007). Na(v)1.1 localizes to axons of parvalbumin-positive inhibitory  
397 interneurons: a circuit basis for epileptic seizures in mice carrying an *Scn1a* gene mutation. *J*  
398 *Neurosci* 27, 5903–5914.
- 399 Oliva, M., Berkovic, S.F., and Petrou, S. (2012). Sodium channels and the neurobiology of epilepsy.  
400 *Epilepsia* 53, 1849–1859.
- 401 Pozzi, D., Lignani, G., Ferrea, E., Contestabile, A., Paonessa, F., D’Alessandro, R., Lippiello, P., Boido,  
402 D., Fassio, A., Meldolesi, J., et al. (2013). REST/NRSF-mediated intrinsic homeostasis protects  
403 neuronal networks from hyperexcitability. *EMBO J.* 32, 2994–3007.
- 404 Rush, A.M., Dib-Hajj, S.D., and Waxman, S.G. (2005). Electrophysiological properties of two axonal  
405 sodium channels, Nav1.2 and Nav1.6, expressed in mouse spinal sensory neurones. *J. Physiol. (Lond.)*  
406 564, 803–815.
- 407 Scott, R.S., Henneberger, C., Padmashri, R., Anders, S., Jensen, T.P., and Rusakov, D.A. (2014).  
408 Neuronal adaptation involves rapid expansion of the action potential initiation site. *Nat Commun* 5,  
409 3817.
- 410 Spratt, P.W.E., Ben-Shalom, R., Keeshen, C.M., Burke, K.J., Clarkson, R.L., Sanders, S.J., and Bender,  
411 K.J. (2019). The Autism-Associated Gene *Scn2a* Contributes to Dendritic Excitability and Synaptic  
412 Function in the Prefrontal Cortex. *Neuron* 103, 673-685.e5.
- 413 Tamamaki, N., Yanagawa, Y., Tomioka, R., Miyazaki, J.-I., Obata, K., and Kaneko, T. (2003). Green  
414 fluorescent protein expression and colocalization with calretinin, parvalbumin, and somatostatin in  
415 the GAD67-GFP knock-in mouse. *J. Comp. Neurol.* 467, 60–79.
- 416 Tate, S.K., Depondt, C., Sisodiya, S.M., Cavalleri, G.L., Schorge, S., Soranzo, N., Thom, M., Sen, A.,  
417 Shorvon, S.D., Sander, J.W., et al. (2005). Genetic predictors of the maximum doses patients receive

418 during clinical use of the anti-epileptic drugs carbamazepine and phenytoin. *Proc Natl Acad Sci U S A*  
419 *102*, 5507–5512.

420 Thompson, C.H., Ben-Shalom, R., Bender, K.J., and George, A.L. (2020). Alternative splicing  
421 potentiates dysfunction of early-onset epileptic encephalopathy SCN2A variants. *J. Gen. Physiol.* *152*.

422 Yu, F.H., Mantegazza, M., Westenbroek, R.E., Robbins, C.A., Kalume, F., Burton, K.A., Spain, W.J.,  
423 McKnight, G.S., Scheuer, T., and Catterall, W.A. (2006). Reduced sodium current in GABAergic  
424 interneurons in a mouse model of severe myoclonic epilepsy in infancy. *Nat Neurosci* *9*, 1142–1149.

425 Yu, W., Sohn, J.-W., Kwon, J., Lee, S.-H., Kim, S., and Ho, W.-K. (2018). Enhancement of dendritic  
426 persistent Na<sup>+</sup> currents by mGluR5 leads to an advancement of spike timing with an increase in  
427 temporal precision. *Mol Brain* *11*, 67.

428

429

430

431 Table 1 Membrane properties of excitatory neurons transfected with splice variants of NaV1.2  
432 (mean  $\pm$  s.e.m.)

|                                                | <b>6A (n=15)</b>   | <b>6N (n=15)</b>   |
|------------------------------------------------|--------------------|--------------------|
| <b>RMP (mV)</b>                                | -45.27 $\pm$ 1.94  | -45.73 $\pm$ 1.98  |
| <b>Input resistance (M<math>\Omega</math>)</b> | 198.80 $\pm$ 11.71 | 183.70 $\pm$ 21.24 |
| <b>V threshold (mV)</b>                        | -18.05 $\pm$ 1.08  | -19.03 $\pm$ 1.09  |
| <b>Current threshold (pA)</b>                  | 297.30 $\pm$ 21.90 | 305.3 $\pm$ 36.49  |
| <b>Rising slope (V/s)</b>                      | 166.1 $\pm$ 15.04  | 157.40 $\pm$ 16.45 |
| <b>AP Amplitude (mV)</b>                       | 60.27 $\pm$ 3.06   | 58.49 $\pm$ 3.20   |
| <b>Repolarizing slope (V/s)</b>                | -73.32 $\pm$ 2.96  | -65.36 $\pm$ 4.84  |

433

434 Table 2 Membrane properties of inhibitory neurons transfected with splice variants of NaV1.1 (mean  
435  $\pm$  s.e.m.)

|                                                | <b>5A (n=15)</b>   | <b>5N (n=13)</b>   |
|------------------------------------------------|--------------------|--------------------|
| <b>RMP (mV)</b>                                | -57.80 $\pm$ 1.84  | -56.85 $\pm$ 1.76  |
| <b>Input resistance (M<math>\Omega</math>)</b> | 146.2 $\pm$ 27.80  | 131.00 $\pm$ 15.64 |
| <b>V threshold (mV)</b>                        | -25.49 $\pm$ 1.17  | -24.37 $\pm$ 1.28  |
| <b>Current threshold (pA)</b>                  | 380.00 $\pm$ 66.63 | 312.30 $\pm$ 54.94 |
| <b>Rising slope (V/s)</b>                      | 82.82 $\pm$ 9.32   | 94.06 $\pm$ 9.99   |
| <b>AP Amplitude (mV)</b>                       | 36.96 $\pm$ 3.01   | 39.45 $\pm$ 3.24   |
| <b>Repolarizing slope (V/s)</b>                | -47.36 $\pm$ 2.95  | -51.19 $\pm$ 2.31  |

436

437

438 Table 3 Membrane properties of excitatory neurons transfected with splice variants of NaV1.1  
439 (mean  $\pm$  s.e.m.)

|                                                | <b>5A (n=19)</b>   | <b>5N (n=13)</b>   |
|------------------------------------------------|--------------------|--------------------|
| <b>RMP (mV)</b>                                | -49.00 $\pm$ 2.66  | -55.00 $\pm$ 2.81  |
| <b>Input resistance (M<math>\Omega</math>)</b> | 188.00 $\pm$ 21.74 | 174.00 $\pm$ 16.22 |
| <b>V threshold (mV)</b>                        | -22.87 $\pm$ 1.22  | -23.33 $\pm$ 1.11  |
| <b>Current threshold (pA)</b>                  | 308.00 $\pm$ 31.64 | 265.50 $\pm$ 24.13 |
| <b>Rising slope (V/s)</b>                      | 68.74 $\pm$ 6.76   | 62.99 $\pm$ 10.58  |
| <b>AP Amplitude (mV)</b>                       | 41.10 $\pm$ 2.53   | 38.81 $\pm$ 3.69   |
| <b>Repolarizing slope (V/s)</b>                | -42.79 $\pm$ 2.079 | -36.50 $\pm$ 3.46  |

440

441

442

443

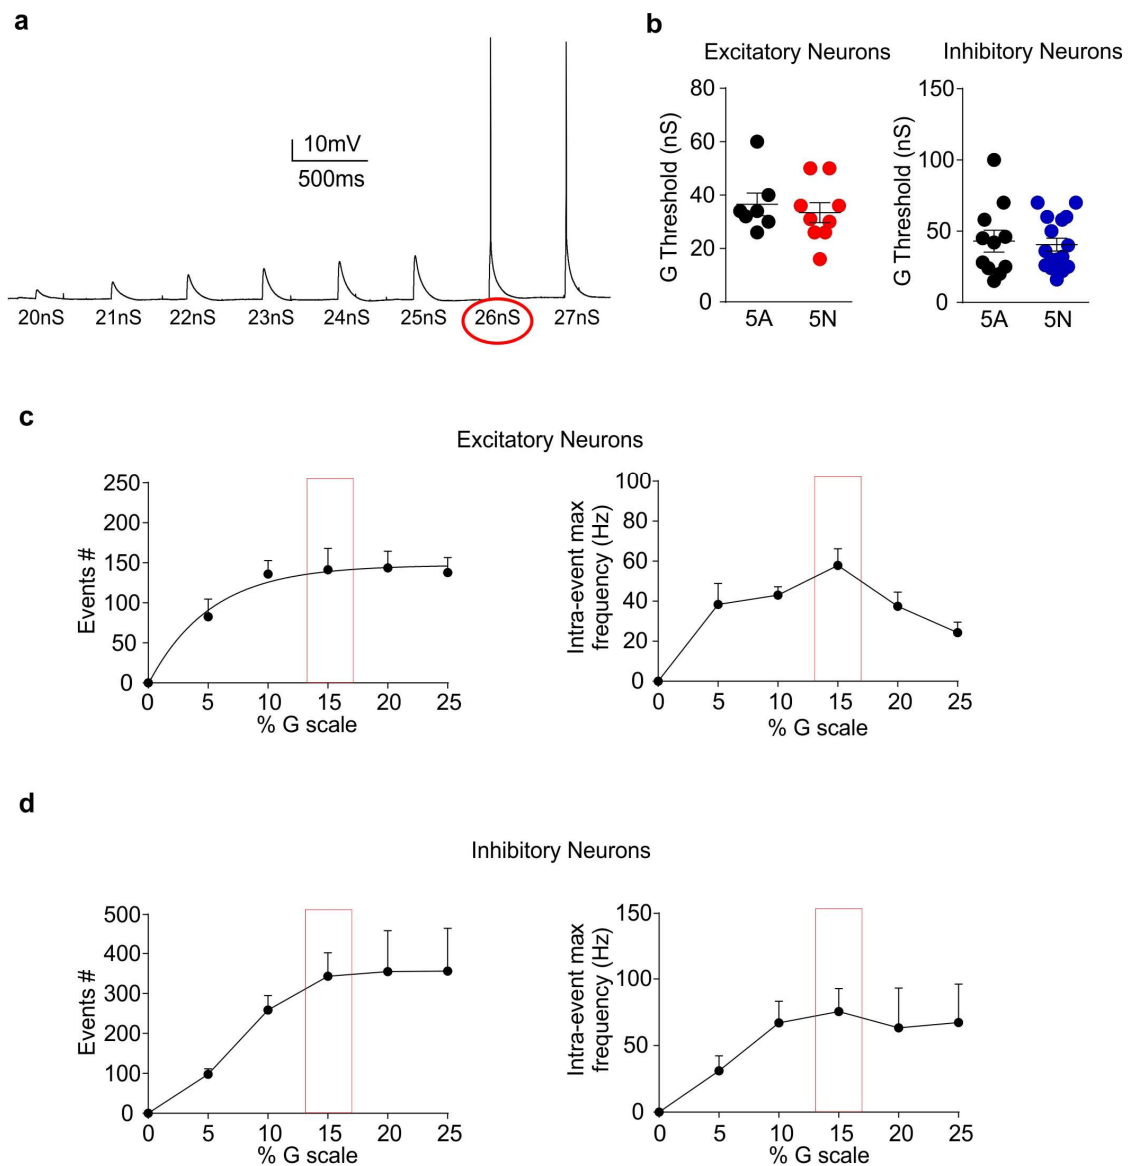

444

445

446 **Figure 1: Dynamic clamp experiments to set the percent of conductance threshold for activity**  
447 **clamp**

448 **(a)** Representative protocol of dynamic clamp AMPA conductance steps ( $E_{rev}=0mV$ ;  $\tau=1ms$ ;  $\Delta G=1nS$ ).

449 The red circle is the conductance threshold in this specific experiment (repeated 10 times for each

450 neuron recorded). **(b)** Conductance threshold is similar in neurons expressing either 5N or 5A splicing

451 isoform of Nav1.1 in both inhibitory and excitatory neurons. **(c and d)** Number of events and intra-

452 event maximal frequency in excitatory and in inhibitory neurons, respectively, against the percent of

453 conductance threshold. The red squares represent the percent of conductance threshold used for all  
454 the dynamic clamp experiments.

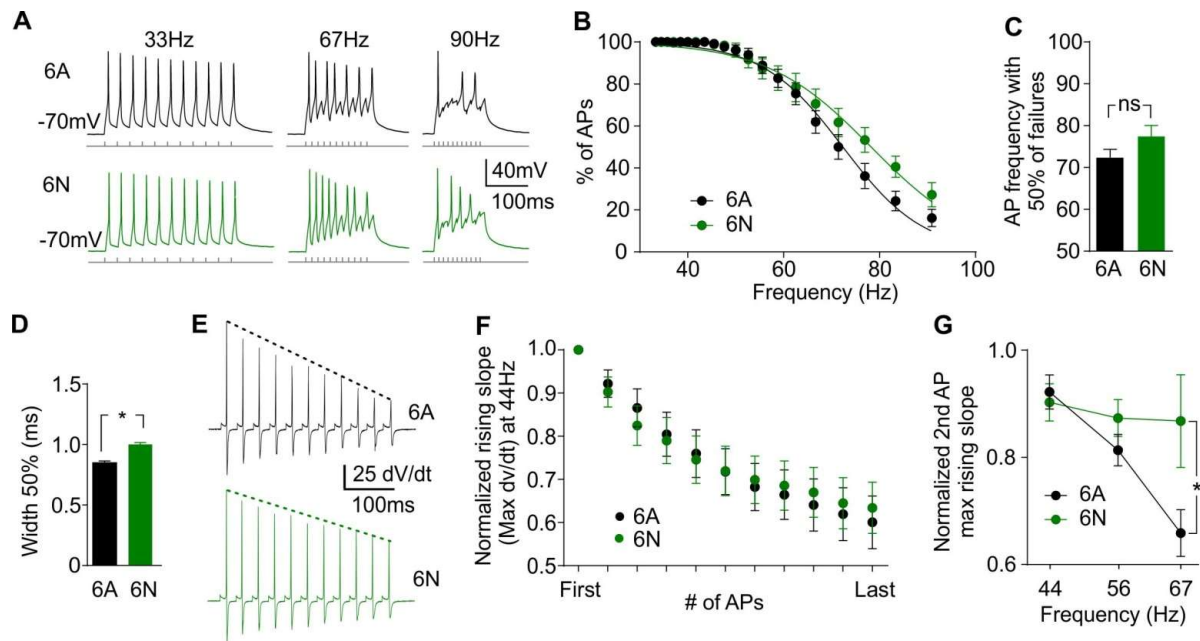

455

456 **Figure 2: Splice variants of Nav1.2 in excitatory neurons have conserved effects on rising phase of**  
 457 **action potentials during fast trains but not on maximal firing rates**

458 **(A)** Representative traces from excitatory neurons transfected with A (top, black) and N (bottom,  
 459 green) splice variants of Nav1.2. **(B)** Excitatory neurons expressing the N variant of Nav1.2 are able  
 460 to sustain slightly, but not significantly, higher rates of firing than those expressing the A variant. **(C)**  
 461 The rate at which excitatory neurons fired action potentials (APs) for 50% of stimuli, as calculated by  
 462 average of exponential fits to individual cells, was not different (ns  $P > 0.05$ , unpaired two-tailed  
 463 Student's T test). **(D)** Expression of the A variant of Nav1.2 reduces the half width of APs in excitatory  
 464 neurons. The mean half width was shorter for neurons expressing the A variant compared to the N  
 465 variant (\*  $P = 0.011$ ; unpaired two-tailed Student's T test). **(E)** The second differential of the APs  
 466 evoked by representative series of steps from an excitatory neuron expressing the A (top, black), or  
 467 N (bottom, green) variant of Nav1.2, showing marked drop in the speed of the rising slope for both  
 468 variants. Traces are from stimuli at 44 Hz. **(F)** During trains of stimuli neither isoform is able to  
 469 maintain rapid rising phases of APs in excitatory neurons. **(G)** At higher rates of firing the reduction  
 470 in rising slope for A variant is evident after a single AP. Despite the smaller intrinsic differences in  
 471 splice variants of Nav1.2 compared to Nav1.1, the Nav1.2 variants confirm that at high frequencies,



472 the N-containing channels are more able to support fast rising phases. Data show the change in  
473 rising slope as measured from the second derivative for those excitatory neurons that fired in  
474 response to both the first and second stimuli. Cells which failed to fire APs were excluded (A n = 10;  
475 N n = 9). At 67 Hz the difference was significant (\* P < 0.05; two-way ANOVA followed by  
476 Bonferroni`s multiple comparisons test).

477

478

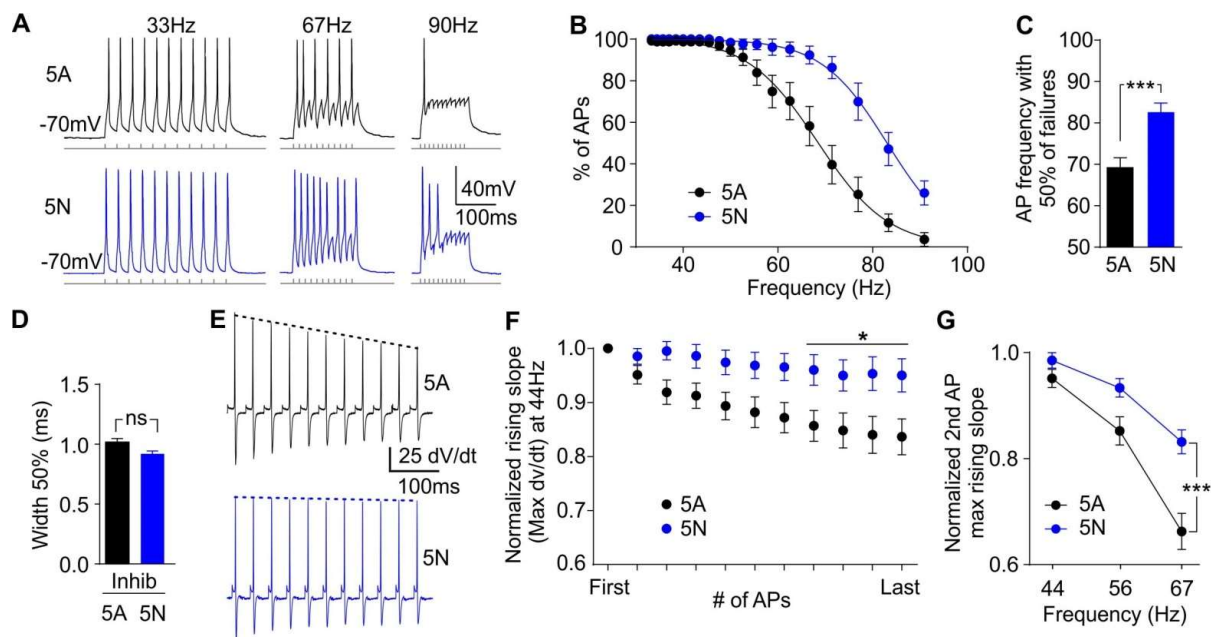

479

480 **Figure 3: Splicing in Nav1.1 is sufficient to alter spike reliability of interneurons during rapid trains**

481 **(A)** Representative traces from interneurons transfected with adult (top, black) and neonatal  
 482 (bottom, blue) variants of Nav1.1 showing reduced ability of the A variant to support action  
 483 potentials (APs) at higher frequencies. **(B)** AP failures increase with stimulation frequency. **(C)** The  
 484 frequency at which interneurons fired APs at 50% of stimuli was significantly higher for neurons  
 485 expressing N channel variants (N, n = 12; A, n = 12; \*\*\* P = 0.0005, unpaired two-tailed Student's T  
 486 test). **(D)** Splicing in Nav1.1 does not change the half width of APs in interneurons. The mean half  
 487 width was similar for interneurons expressing N and A variants (ns P > 0.05, unpaired two-tailed  
 488 Student's T test). **(E)** Representative second differentials of the APs evoked by a series of steps from  
 489 interneurons expressing A (top, black), and N (bottom, blue) splice variants showing slowing of the  
 490 rising phase of adult only. The height of the peak, as indicated by the dotted lines, corresponds to  
 491 the steepest part of the rising slope. Traces are from stimuli at 44 Hz, which is the fastest rate of  
 492 stimuli where interneurons expressing A variants were able to support APs for all steps. **(F)** A splice  
 493 variants show reduced ability compared to N variants to maintain fast rising slopes of APs during  
 494 trains of stimuli. By the end of the series the APs supported by the A variants were significantly

495 slower than those supported by N variants (\* P < 0.05; two-way ANOVA followed by Bonferroni  
496 correction for multiple comparisons, A n = 12; N n = 13). **(G)** At higher rates of firing the reduction in  
497 rising slope for A variants is evident after a single AP. Cells which failed to fire APs were excluded (A  
498 n = 12; N n = 13). The difference was significant at 66 Hz (\*\*\*) P < 0.001; Two-way ANOVA followed  
499 by Bonferroni correction for multiple comparisons).

500

501

502

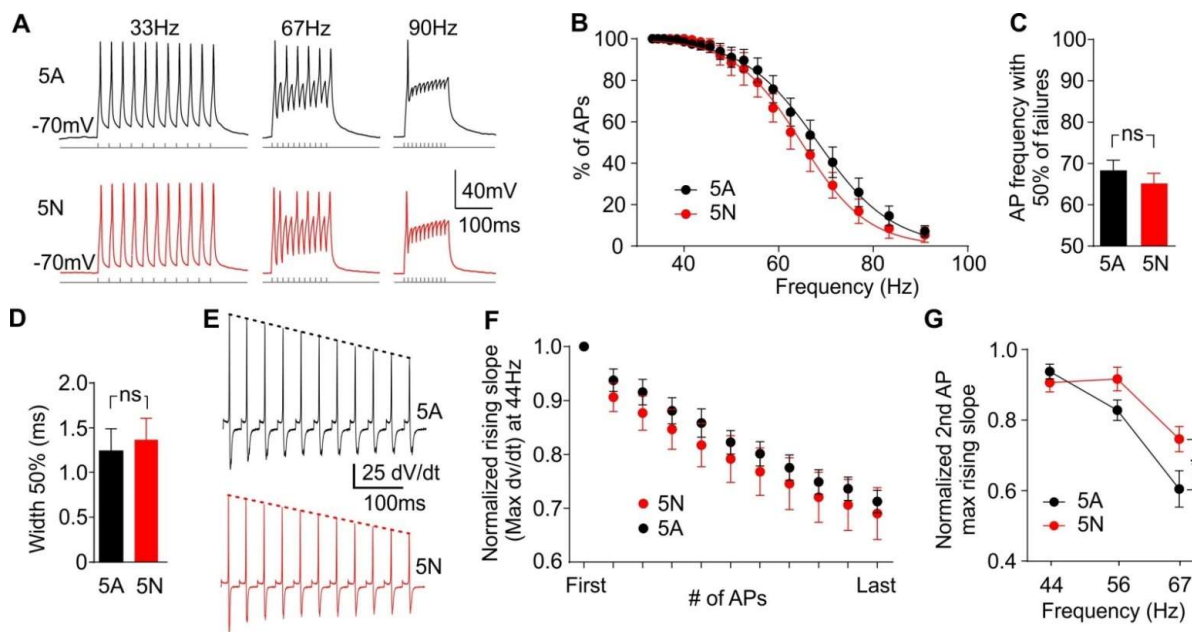

503

504 **Figure 4: The effect of splicing is conserved, but consequences depend on cell background.**

505 **(A)** Representative traces from excitatory neurons transfected with A (top, black) and N (bottom,  
 506 red) splice variants of Nav1.1. Recordings were carried out in  $1\mu\text{M}$  TTX to block endogenous  
 507 channels. **(B)** As with variants of Nav1.2, neither splice variant of Nav1.1 is able to sustain high rates  
 508 of firing in these cells. **(C)** The rate at which neurons fired action potentials (APs) at 50% of stimuli, as  
 509 calculated by the average of exponential fits to individual cells, were not different (ns  $P > 0.05$ ,  
 510 unpaired two-tailed Student's T test). **(D)** Splicing in Nav1.1 does not change the half width of APs in  
 511 excitatory neurons. The mean half width was similar for neurons expressing adult ( $1.54 \pm 0.08$  ms)  
 512 and neonatal variants ( $1.36 \pm 0.08$  ms; ns  $P > 0.05$ , Mann-Whitney test). RMP, Input resistance, AP  
 513 thresholds, maximal rising slope, amplitude, and maximal repolarizing slope were all similar for  
 514 neurons expressing both variants. **(E)** The second differentials of APs evoked by a representative  
 515 series of steps from an excitatory neuron expressing adult (top, black), and neonatal variants  
 516 (bottom, red) both show decay in rate of rising slope. **(F)** During trains of stimuli both A and N  
 517 variants of Nav1.1 show marked slowing of the rising phases of the APs. A and N splice variant rising  
 518 slopes were similar throughout the trains. **(G)** At high firing frequencies the A variant of Nav1.1

519 showed reduced rising slope after a single AP. The difference is consistent with that seen in  
520 interneurons with Nav1.1 and excitatory neurons expressing splice variants of Nav1.2. Data show the  
521 change in rising slope as measured from the second derivative for excitatory neurons that fired in  
522 response to both the first and second stimuli. Cells which failed to fire APs were excluded (A, n = 10;  
523 N, n = 6). At 66 Hz the difference was significant (\*  $P < 0.05$ ; two-way ANOVA followed by  
524 Bonferroni's multiple comparisons test).

525

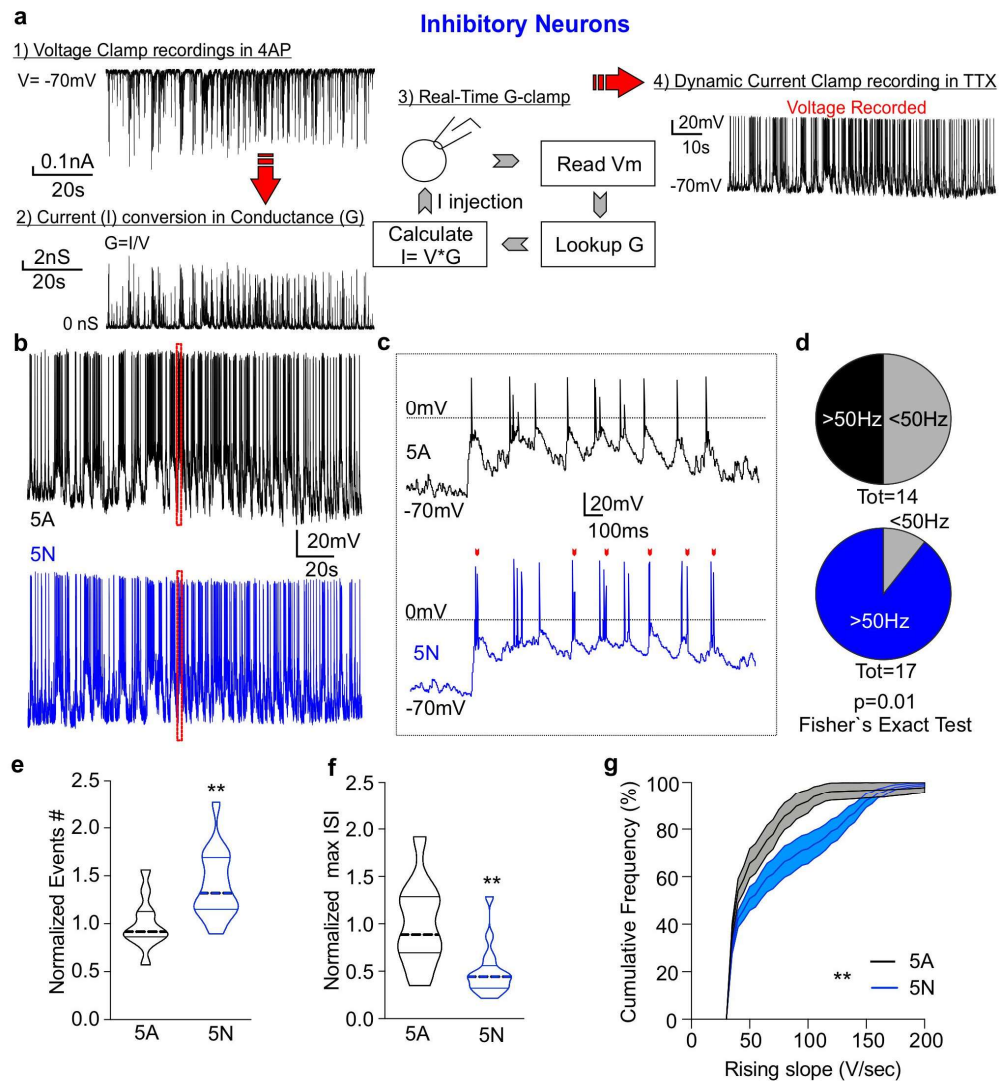

526

527 **Figure 5: Dynamic clamp experiments demonstrate that splicing in Nav1.1 is sufficient to alter how**  
 528 **interneurons respond during high frequency bursts.**

529 **(A)** An overview of the dynamic clamp procedure. Voltage clamp recordings of epileptiform bursts  
 530 from interneurons in the presence of 4AP produced current traces (panel 1). To better capture cell  
 531 type specificity of epileptiform activity, different inputs were used for inhibitory and excitatory  
 532 recordings. Recorded current traces of synaptic inputs were converted via dynamic clamp to  
 533 conductances (panel 2), which were used as a template for dynamic clamp (panel 3) to probe voltage  
 534 responses (panel 4) from interneurons expressing the N or A splice variants of Nav1.1 in presence of  
 535 TTX. **(B)** Representative voltage traces of the Nav1.1 variants resulting from dynamic current

536 injection of the conductance trace shown in interneurons. **(C)** Enlarged representative traces of  
537 Nav1.1 variants from the dotted box in B. The red arrowheads indicate points where the N variant  
538 (blue) fired an AP and the A (black) failed. Note these are generally during fast bursts. **(D)**  
539 Significantly more inhibitory neurons expressing the N variant attained firing frequencies above 50  
540 Hz. **(E)** Number of AP (events) during activity clamp recordings normalized to each independent  
541 preparation (5A n=11; 5N n=16. \*\*p<0.01 Unpaired Student's t test). **(F)** Maximal inter-spike  
542 intervals reached during activity clamp recordings normalized to each independent preparation (5A  
543 n=11; 5N n=16. \*\*p<0.01 Unpaired Student's t test). **(G)** Cumulative plot representing the overall  
544 distribution of rising slopes during activity clamp recordings (5A n=11; 5N n=16. \*\*p<0.01. Splice  
545 variant factor, two-way ANOVA followed by Bonferroni multi-comparison).

546

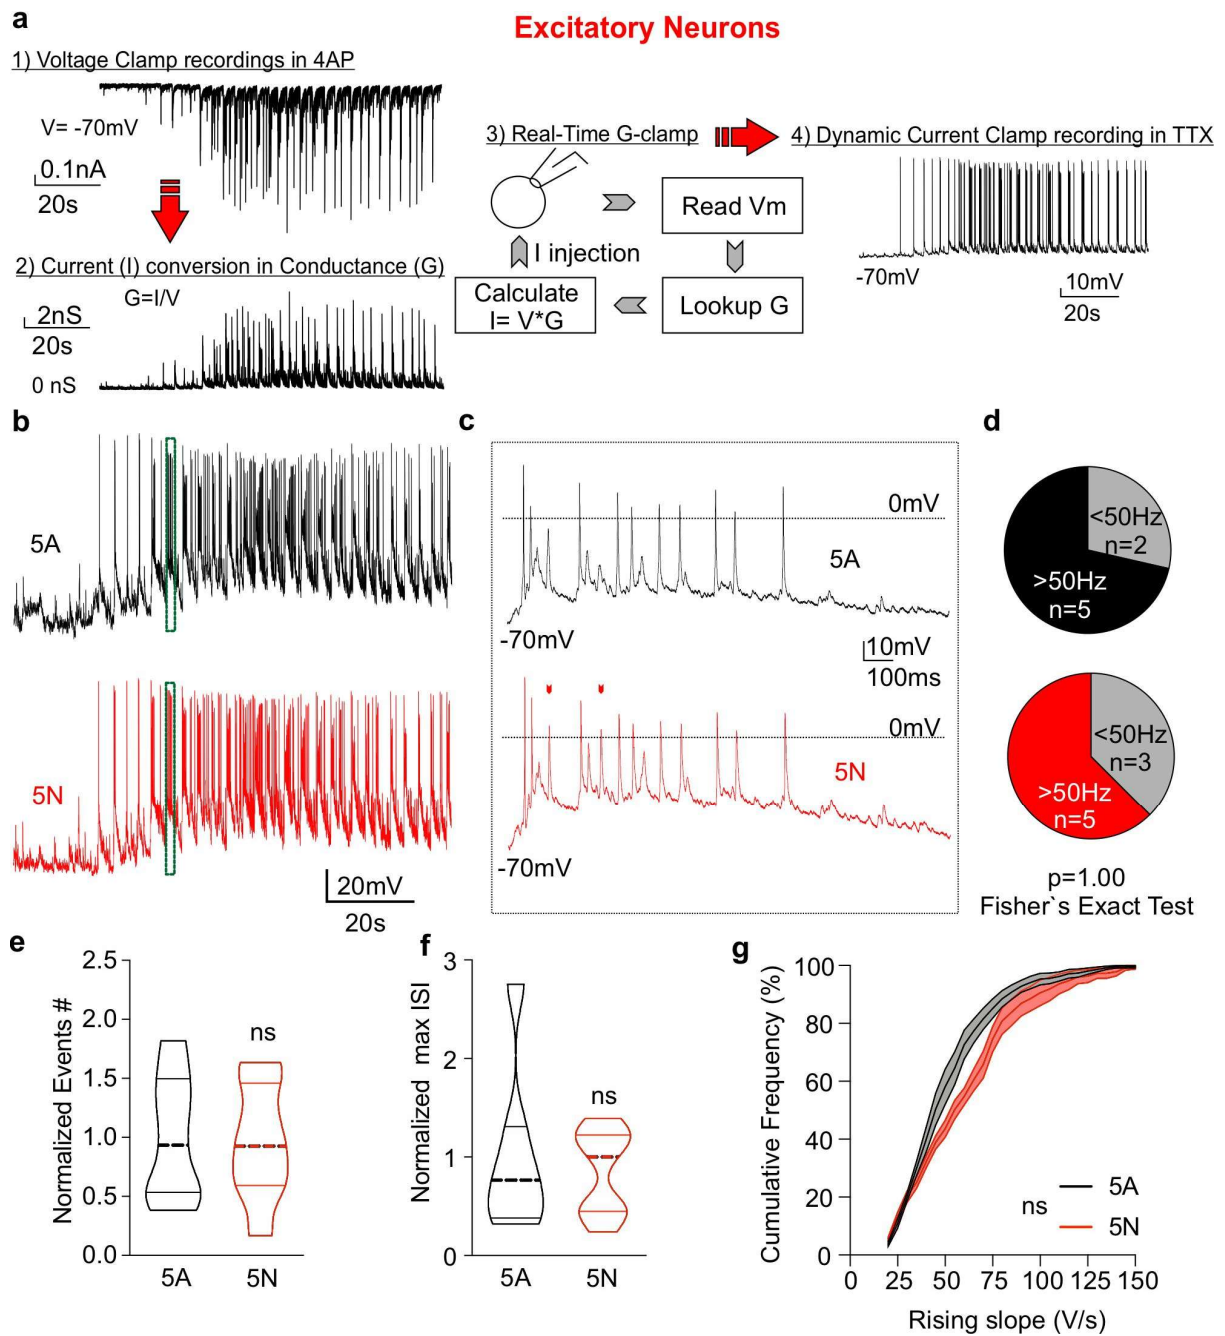

547

548 **Figure 6: Dynamic clamp experiments demonstrate that splicing in Nav1.1 is not sufficient to alter**  
 549 **how excitatory neurons respond during high frequency bursts.**

550 **(A)** An overview of the dynamic clamp procedure. Voltage clamp recordings of epileptiform bursts  
 551 from excitatory neurons in the presence of 4AP produced current traces (panel 1). To better capture  
 552 cell type specificity of epileptiform activity, different inputs were used for inhibitory and excitatory  
 553 recordings. Recorded current traces of synaptic inputs were converted via dynamic clamp to



554 conductances (panel 2), which were used as a template for dynamic clamp (panel 3) to probe voltage  
555 responses (panel 4) from excitatory neurons expressing the N or A splice variants of Nav1.1 in  
556 presence of TTX. **(B)** Representative voltage traces of the Nav1.1 variants resulting from dynamic  
557 current injection of the conductance trace shown in excitatory neurons. **(C)** Enlarged representative  
558 traces of Nav1.1 variants from the dotted box in B. The red arrowheads indicate points where the N  
559 variant (blue) fired an AP and the A (black) failed. Note these are generally during fast bursts. **(D)**  
560 No difference in excitatory neurons expressing the N variant attained firing frequencies above 50 Hz.  
561 **(E)** Number of AP (events) during activity clamp recordings normalized to each independent  
562 preparation (5A n=7; 5N n=8. Unpaired Student's t test). **(F)** Maximal inter-spike intervals reached  
563 during activity clamp recordings normalized to each independent preparation (5A n=7; 5N n=8.  
564 Unpaired Student's t test). **(G)** Cumulative plot representing the overall distribution of rising slopes  
565 during activity camp recordings (P = 0.07; 5A n=11; 5N n=16. Splice variant factor, two-way ANOVA  
566 followed by Bonferroni multi-comparison).

567
